# Supplementary material for: Exploring the microbiota of upper respiratory tract during the development of pneumonia in a mouse model
Source: PLoS One. 2019 Sep 27;14(9):e0222589. doi: 10.1371/journal.pone.0222589 (PMC6764665; doi:10.1371/journal.pone.0222589)
Supplement: S1 Table — Relative abundance of ORA (Sheet 1), NAL (Sheet 2), and BAL (Sheet 3) in Family level. The column names consist of three components (the name of sample (ORA, NAL, or BAL) + group (C, control or K, infection with K. pneumoniae) + mouse number (1 to 5)). (XLSX) [file pone.0222589.s001.xlsx]

## Sheet: ORA_Family
Family (Aggregated)	Taxonomy	Combined Abundance	ORAC1 Abundance	ORAC2 Abundance	ORAC3 Abundance	ORAC4 Abundance	ORAC5 Abundance	ORAK1 Abundance	ORAK2 Abundance	ORAK3 Abundance	ORAK4 Abundance	ORAK5 Abundance
Blastocatellaceae	D_0__Bacteria, D_1__Acidobacteria, D_2__Blastocatellia (Subgroup 4), D_3__Blastocatellales, D_4__Blastocatellaceae	3	0	0	0	0	0	0	0	0	1.19e-05	0
Pyrinomonadaceae	D_0__Bacteria, D_1__Acidobacteria, D_2__Blastocatellia (Subgroup 4), D_3__Pyrinomonadales, D_4__Pyrinomonadaceae	2	0	0	0	0	0	3.54e-06	0	0	0	3.9e-06
Actinomycetaceae	D_0__Bacteria, D_1__Actinobacteria, D_2__Actinobacteria, D_3__Actinomycetales, D_4__Actinomycetaceae	81	4.42e-05	0	5.19e-06	0	7.47e-06	0.00023	3.41e-06	0	0	3.9e-06
Corynebacteriaceae	D_0__Bacteria, D_1__Actinobacteria, D_2__Actinobacteria, D_3__Corynebacteriales, D_4__Corynebacteriaceae	162068	0.00861	0.02	0.13	0.03	0.03	0.02	0.01	0.2	0.03	0.19
Mycobacteriaceae	D_0__Bacteria, D_1__Actinobacteria, D_2__Actinobacteria, D_3__Corynebacteriales, D_4__Mycobacteriaceae	27	0	0	0	0	0	9.56e-05	0	0	0	0
Nocardiaceae	D_0__Bacteria, D_1__Actinobacteria, D_2__Actinobacteria, D_3__Corynebacteriales, D_4__Nocardiaceae	38	0	1.48e-05	5.19e-06	0	3.73e-06	1.42e-05	1.02e-05	8.69e-05	3.98e-06	1.17e-05
Beutenbergiaceae	D_0__Bacteria, D_1__Actinobacteria, D_2__Actinobacteria, D_3__Micrococcales, D_4__Beutenbergiaceae	2	0	0	0	0	0	0	6.81e-06	0	0	0
Brevibacteriaceae	D_0__Bacteria, D_1__Actinobacteria, D_2__Actinobacteria, D_3__Micrococcales, D_4__Brevibacteriaceae	5	1.21e-05	0	0	0	0	7.08e-06	0	0	0	0
Dermacoccaceae	D_0__Bacteria, D_1__Actinobacteria, D_2__Actinobacteria, D_3__Micrococcales, D_4__Dermacoccaceae	13	0	0	0	0	3.73e-06	4.25e-05	0	0	0	0
Microbacteriaceae	D_0__Bacteria, D_1__Actinobacteria, D_2__Actinobacteria, D_3__Micrococcales, D_4__Microbacteriaceae	8	0	7.42e-06	0	0	0	1.06e-05	3.41e-06	0	0	7.8e-06
Micrococcaceae	D_0__Bacteria, D_1__Actinobacteria, D_2__Actinobacteria, D_3__Micrococcales, D_4__Micrococcaceae	8175	0.00363	0.00146	0.000789	0.00395	0.00169	0.00235	0.00357	0.00345	0.00427	0.00594
Propionibacteriaceae	D_0__Bacteria, D_1__Actinobacteria, D_2__Actinobacteria, D_3__Propionibacteriales, D_4__Propionibacteriaceae	7747	0.000121	6.67e-05	5.71e-05	5.58e-05	0.000526	0.03	0.000191	4.14e-06	0.000235	2.73e-05
Atopobiaceae	D_0__Bacteria, D_1__Actinobacteria, D_2__Coriobacteriia, D_3__Coriobacteriales, D_4__Atopobiaceae	6	0	0	2.08e-05	3.49e-06	3.73e-06	0	0	0	0	0
Bacteroidaceae	D_0__Bacteria, D_1__Bacteroidetes, D_2__Bacteroidia, D_3__Bacteroidales, D_4__Bacteroidaceae	27	4.02e-06	7.42e-06	5.19e-06	0	2.99e-05	3.54e-06	1.36e-05	4.14e-06	1.59e-05	1.95e-05
Muribaculaceae	D_0__Bacteria, D_1__Bacteroidetes, D_2__Bacteroidia, D_3__Bacteroidales, D_4__Muribaculaceae	463	2.41e-05	2.6e-05	0.00122	2.79e-05	0.000601	3.54e-06	5.45e-05	2.07e-05	4.38e-05	4.68e-05
Porphyromonadaceae	D_0__Bacteria, D_1__Bacteroidetes, D_2__Bacteroidia, D_3__Bacteroidales, D_4__Porphyromonadaceae	50	0.000145	3.71e-06	5.19e-06	3.49e-06	7.47e-06	2.48e-05	3.41e-06	4.14e-06	0	0
Prevotellaceae	D_0__Bacteria, D_1__Bacteroidetes, D_2__Bacteroidia, D_3__Bacteroidales, D_4__Prevotellaceae	18	8.04e-06	0	5.19e-06	0	0	4.96e-05	0	4.14e-06	0	0
Rikenellaceae	D_0__Bacteria, D_1__Bacteroidetes, D_2__Bacteroidia, D_3__Bacteroidales, D_4__Rikenellaceae	10	0	0	5.19e-05	0	0	0	0	0	0	0
Tannerellaceae	D_0__Bacteria, D_1__Bacteroidetes, D_2__Bacteroidia, D_3__Bacteroidales, D_4__Tannerellaceae	9	0	0	2.59e-05	0	1.49e-05	0	0	0	0	0
Flavobacteriaceae	D_0__Bacteria, D_1__Bacteroidetes, D_2__Bacteroidia, D_3__Flavobacteriales, D_4__Flavobacteriaceae	4	0	0	0	0	0	7.08e-06	0	0	7.96e-06	0
uncultured soil bacterium	D_0__Bacteria, D_1__Chloroflexi, D_2__Anaerolineae, D_3__SJA-15, D_4__uncultured soil bacterium	2	0	0	0	0	0	0	0	0	0	7.8e-06
Ambiguous_taxa-1	D_0__Bacteria, D_1__Cyanobacteria, D_2__Oxyphotobacteria, D_3__Chloroplast, Ambiguous_taxa	80	0	0	2.08e-05	2.09e-05	7.47e-06	6.73e-05	0.000102	1.66e-05	5.57e-05	3.9e-06
Phaseolus acutifolius (tepary bean)	D_0__Bacteria, D_1__Cyanobacteria, D_2__Oxyphotobacteria, D_3__Chloroplast, D_4__Phaseolus acutifolius (tepary bean)	5	0	0	1.04e-05	0	0	3.54e-06	6.81e-06	0	0	0
Solanum melongena (eggplant)	D_0__Bacteria, D_1__Cyanobacteria, D_2__Oxyphotobacteria, D_3__Chloroplast, D_4__Solanum melongena (eggplant)	7	0	0	0	0	1.49e-05	1.06e-05	0	0	0	0
Triticum aestivum (bread wheat)	D_0__Bacteria, D_1__Cyanobacteria, D_2__Oxyphotobacteria, D_3__Chloroplast, D_4__Triticum aestivum (bread wheat)	85	7.64e-05	1.11e-05	5.19e-06	3.49e-06	0	0.000124	5.79e-05	4.14e-06	1.99e-05	1.17e-05
Deinococcaceae	D_0__Bacteria, D_1__Deinococcus-Thermus, D_2__Deinococci, D_3__Deinococcales, D_4__Deinococcaceae	6	0	0	2.08e-05	0	0	7.08e-06	0	0	0	0
Thermaceae	D_0__Bacteria, D_1__Deinococcus-Thermus, D_2__Deinococci, D_3__Thermales, D_4__Thermaceae	18	5.23e-05	0	0	3.49e-06	0	3.54e-06	3.41e-06	8.28e-06	0	0
Campylobacteraceae	D_0__Bacteria, D_1__Epsilonbacteraeota, D_2__Campylobacteria, D_3__Campylobacterales, D_4__Campylobacteraceae	4	0	0	0	0	0	0	0	0	1.59e-05	0
Ambiguous_taxa-2	D_0__Bacteria, D_1__Firmicutes, D_2__Bacilli, Ambiguous_taxa, Ambiguous_taxa	2	0	0	0	0	0	7.08e-06	0	0	0	0
Ambiguous_taxa-3	D_0__Bacteria, D_1__Firmicutes, D_2__Bacilli, D_3__Bacillales, Ambiguous_taxa	17	0	0	5.19e-06	0	0	3.54e-06	0	2.9e-05	0	3.12e-05
Alicyclobacillaceae	D_0__Bacteria, D_1__Firmicutes, D_2__Bacilli, D_3__Bacillales, D_4__Alicyclobacillaceae	51	0	3.71e-05	7.78e-05	3.49e-06	7.47e-06	3.54e-06	1.02e-05	2.9e-05	2.79e-05	1.95e-05
Bacillaceae	D_0__Bacteria, D_1__Firmicutes, D_2__Bacilli, D_3__Bacillales, D_4__Bacillaceae	5815	0.000189	7.42e-05	0.00249	0.00077	0.000549	0.00111	0.000521	0.00904	0.000887	0.00791
Family XI-1	D_0__Bacteria, D_1__Firmicutes, D_2__Bacilli, D_3__Bacillales, D_4__Family XI	18	0	0	1.04e-05	6.97e-06	3.73e-06	4.25e-05	0	4.14e-06	0	0
Paenibacillaceae	D_0__Bacteria, D_1__Firmicutes, D_2__Bacilli, D_3__Bacillales, D_4__Paenibacillaceae	5	0	3.71e-06	0	0	0	0	0	4.14e-06	0	1.17e-05
Planococcaceae	D_0__Bacteria, D_1__Firmicutes, D_2__Bacilli, D_3__Bacillales, D_4__Planococcaceae	5730	0.000418	0.000111	0.000311	0.000199	0.00266	0.000886	0.000375	0.00851	0.000868	0.00832
Staphylococcaceae	D_0__Bacteria, D_1__Firmicutes, D_2__Bacilli, D_3__Bacillales, D_4__Staphylococcaceae	204406	0.01	0.00745	0.34	0.02	0.01	0.06	0.05	0.22	0.04	0.13
Aerococcaceae	D_0__Bacteria, D_1__Firmicutes, D_2__Bacilli, D_3__Lactobacillales, D_4__Aerococcaceae	19815	0.000322	0.000185	0.00218	0.00276	0.000937	0.00131	0.000313	0.03	0.00128	0.04
Carnobacteriaceae	D_0__Bacteria, D_1__Firmicutes, D_2__Bacilli, D_3__Lactobacillales, D_4__Carnobacteriaceae	4735	0.000294	0.000141	0.000462	0.000279	0.000183	0.000843	0.000341	0.00497	0.000589	0.01
Enterococcaceae	D_0__Bacteria, D_1__Firmicutes, D_2__Bacilli, D_3__Lactobacillales, D_4__Enterococcaceae	1679	0	7.42e-06	1.56e-05	0	2.61e-05	0.00324	0.00216	0.00036	2.79e-05	8.97e-05
Lactobacillaceae	D_0__Bacteria, D_1__Firmicutes, D_2__Bacilli, D_3__Lactobacillales, D_4__Lactobacillaceae	73809	0.00114	0.00257	0.02	0.000987	0.2	0.00482	0.04	0.00531	0.00673	0.00221
Streptococcaceae	D_0__Bacteria, D_1__Firmicutes, D_2__Bacilli, D_3__Lactobacillales, D_4__Streptococcaceae	2049309	0.96	0.96	0.49	0.93	0.74	0.86	0.88	0.47	0.9	0.58
Clostridiaceae 1	D_0__Bacteria, D_1__Firmicutes, D_2__Clostridia, D_3__Clostridiales, D_4__Clostridiaceae 1	97	0	0	0.000254	3.49e-06	9.71e-05	2.83e-05	1.7e-05	1.66e-05	7.96e-06	7.8e-06
Family XI-2	D_0__Bacteria, D_1__Firmicutes, D_2__Clostridia, D_3__Clostridiales, D_4__Family XI	159	8.04e-05	0	2.08e-05	3.49e-06	0	0.000251	1.02e-05	0.000116	1.19e-05	0.000113
Lachnospiraceae	D_0__Bacteria, D_1__Firmicutes, D_2__Clostridia, D_3__Clostridiales, D_4__Lachnospiraceae	546	1.61e-05	4.45e-05	0.000317	3.83e-05	0.00118	6.02e-05	0.000293	3.31e-05	8.36e-05	3.51e-05
Peptostreptococcaceae	D_0__Bacteria, D_1__Firmicutes, D_2__Clostridia, D_3__Clostridiales, D_4__Peptostreptococcaceae	8225	0.000269	0.0002	0.01	0.00075	0.000511	0.00221	0.00163	0.01	0.00134	0.00521
Ruminococcaceae	D_0__Bacteria, D_1__Firmicutes, D_2__Clostridia, D_3__Clostridiales, D_4__Ruminococcaceae	125	0	0	0.000234	3.49e-05	0.000179	1.06e-05	0	2.07e-05	4.38e-05	1.17e-05
Erysipelotrichaceae	D_0__Bacteria, D_1__Firmicutes, D_2__Erysipelotrichia, D_3__Erysipelotrichales, D_4__Erysipelotrichaceae	495	0	1.85e-05	0.000519	3.49e-05	0.00103	2.83e-05	0.000106	7.03e-05	4.78e-05	0.000136
Veillonellaceae	D_0__Bacteria, D_1__Firmicutes, D_2__Negativicutes, D_3__Selenomonadales, D_4__Veillonellaceae	12	4.02e-06	0	0	0	0	3.9e-05	0	0	0	0
Fusobacteriaceae	D_0__Bacteria, D_1__Fusobacteria, D_2__Fusobacteriia, D_3__Fusobacteriales, D_4__Fusobacteriaceae	4	0	0	0	0	0	1.42e-05	0	0	0	0
Leptotrichiaceae	D_0__Bacteria, D_1__Fusobacteria, D_2__Fusobacteriia, D_3__Fusobacteriales, D_4__Leptotrichiaceae	14	4.02e-06	0	1.04e-05	0	3.73e-06	2.83e-05	0	8.28e-06	0	0
Hydrogenedensaceae	D_0__Bacteria, D_1__Hydrogenedentes, D_2__Hydrogenedentia, D_3__Hydrogenedentiales, D_4__Hydrogenedensaceae	3	0	0	0	0	0	3.54e-06	0	0	7.96e-06	0
Acetobacteraceae	D_0__Bacteria, D_1__Proteobacteria, D_2__Alphaproteobacteria, D_3__Acetobacterales, D_4__Acetobacteraceae	51	0.000157	7.42e-06	2.08e-05	0	0	1.77e-05	3.41e-06	0	0	0
Caulobacteraceae	D_0__Bacteria, D_1__Proteobacteria, D_2__Alphaproteobacteria, D_3__Caulobacterales, D_4__Caulobacteraceae	8	0	1.48e-05	0	0	0	1.42e-05	0	0	0	0
uncultured	D_0__Bacteria, D_1__Proteobacteria, D_2__Alphaproteobacteria, D_3__Micavibrionales, D_4__uncultured	2	0	7.42e-06	0	0	0	0	0	0	0	0
Beijerinckiaceae	D_0__Bacteria, D_1__Proteobacteria, D_2__Alphaproteobacteria, D_3__Rhizobiales, D_4__Beijerinckiaceae	14	0	0	0	0	0	4.96e-05	0	0	0	0
Rhizobiaceae	D_0__Bacteria, D_1__Proteobacteria, D_2__Alphaproteobacteria, D_3__Rhizobiales, D_4__Rhizobiaceae	14	3.62e-05	0	0	0	0	1.77e-05	0	0	0	0
Xanthobacteraceae	D_0__Bacteria, D_1__Proteobacteria, D_2__Alphaproteobacteria, D_3__Rhizobiales, D_4__Xanthobacteraceae	50	0.000157	0	0	6.97e-06	0	2.13e-05	3.41e-06	0	0	7.8e-06
Rhodobacteraceae	D_0__Bacteria, D_1__Proteobacteria, D_2__Alphaproteobacteria, D_3__Rhodobacterales, D_4__Rhodobacteraceae	17	0	0	0	0	7.47e-06	3.19e-05	1.02e-05	8.28e-06	0	3.9e-06
Mitochondria	D_0__Bacteria, D_1__Proteobacteria, D_2__Alphaproteobacteria, D_3__Rickettsiales, D_4__Mitochondria	5	0	0	0	0	0	1.77e-05	0	0	0	0
Sphingomonadaceae	D_0__Bacteria, D_1__Proteobacteria, D_2__Alphaproteobacteria, D_3__Sphingomonadales, D_4__Sphingomonadaceae	44	0.000109	0	0	6.97e-06	0	3.54e-05	1.7e-05	0	0	0
Desulfovibrionaceae	D_0__Bacteria, D_1__Proteobacteria, D_2__Deltaproteobacteria, D_3__Desulfovibrionales, D_4__Desulfovibrionaceae	2	0	0	5.19e-06	0	0	0	0	4.14e-06	0	0
Burkholderiaceae	D_0__Bacteria, D_1__Proteobacteria, D_2__Gammaproteobacteria, D_3__Betaproteobacteriales, D_4__Burkholderiaceae	11412	0.000233	0.000178	0.000285	0.000432	0.00182	0.000333	0.000273	0.02	0.000895	0.02
Neisseriaceae	D_0__Bacteria, D_1__Proteobacteria, D_2__Gammaproteobacteria, D_3__Betaproteobacteriales, D_4__Neisseriaceae	25	8.04e-06	0	0	3.49e-06	0	6.73e-05	0	0	7.96e-06	3.9e-06
Enterobacteriaceae	D_0__Bacteria, D_1__Proteobacteria, D_2__Gammaproteobacteria, D_3__Enterobacteriales, D_4__Enterobacteriaceae	452	0.000181	2.6e-05	2.59e-05	0.000105	2.99e-05	0.000769	0.000181	9.52e-05	0.000103	0.000148
Moraxellaceae	D_0__Bacteria, D_1__Proteobacteria, D_2__Gammaproteobacteria, D_3__Pseudomonadales, D_4__Moraxellaceae	14	0	0	0	6.97e-06	0	7.08e-06	0	8.28e-06	2.79e-05	3.9e-06
Pseudomonadaceae	D_0__Bacteria, D_1__Proteobacteria, D_2__Gammaproteobacteria, D_3__Pseudomonadales, D_4__Pseudomonadaceae	6	0	0	0	0	0	2.13e-05	0	0	0	0
Xanthomonadaceae	D_0__Bacteria, D_1__Proteobacteria, D_2__Gammaproteobacteria, D_3__Xanthomonadales, D_4__Xanthomonadaceae	18	0	0	0	0	0	3.19e-05	1.7e-05	0	1.59e-05	0

## Sheet: NAL_Family
Family (Aggregated)	Taxonomy	Combined Abundance	NAL C1 Abundance	NAL C2 Abundance	NAL C3 Abundance	NAL C4 Abundance	NAL C5 Abundance	NAL K1 Abundance	NAL K2 Abundance	NAL K3 Abundance	NAL K4 Abundance	NAL K5 Abundance
uncultured-1	D_0__Bacteria, D_1__Acidobacteria, D_2__Acidobacteriia, D_3__Acidobacteriales, D_4__uncultured	2	0	0	0	1.43e-05	0	0	0	0	0	0
Blastocatellaceae	D_0__Bacteria, D_1__Acidobacteria, D_2__Blastocatellia (Subgroup 4), D_3__Blastocatellales, D_4__Blastocatellaceae	783	0	0	0	0.00559	0	0	0	0	0	0
Pyrinomonadaceae	D_0__Bacteria, D_1__Acidobacteria, D_2__Blastocatellia (Subgroup 4), D_3__Pyrinomonadales, D_4__Pyrinomonadaceae	1062	0.000138	0.00156	0.000187	0.00336	0.000159	0.00189	0.000114	4.02e-05	0.000405	0
uncultured-2	D_0__Bacteria, D_1__Actinobacteria, D_2__Acidimicrobiia, D_3__Microtrichales, D_4__uncultured	2	0	0	0	0	0	0	0	0	0	1.89e-05
Actinomycetaceae	D_0__Bacteria, D_1__Actinobacteria, D_2__Actinobacteria, D_3__Actinomycetales, D_4__Actinomycetaceae	203	0.000125	0.00025	3.12e-05	7.86e-05	0.000425	0.000231	0.000155	0	3.11e-05	2.84e-05
Bifidobacteriaceae	D_0__Bacteria, D_1__Actinobacteria, D_2__Actinobacteria, D_3__Bifidobacteriales, D_4__Bifidobacteriaceae	81	0	0	0	0	0.000442	0	0	0.000241	0	0
Corynebacteriaceae	D_0__Bacteria, D_1__Actinobacteria, D_2__Actinobacteria, D_3__Corynebacteriales, D_4__Corynebacteriaceae	246939	0.23	0.07	0.25	0.03	0.28	0.14	0.21	0.23	0.18	0.28
Mycobacteriaceae	D_0__Bacteria, D_1__Actinobacteria, D_2__Actinobacteria, D_3__Corynebacteriales, D_4__Mycobacteriaceae	272	7.91e-05	0.000696	5.19e-06	0.000307	0.000407	0.000311	0.000114	0	3.11e-05	0
Nocardiaceae	D_0__Bacteria, D_1__Actinobacteria, D_2__Actinobacteria, D_3__Corynebacteriales, D_4__Nocardiaceae	170	0.00111	1.79e-05	0	0	0	0	0	0	0	0
Geodermatophilaceae	D_0__Bacteria, D_1__Actinobacteria, D_2__Actinobacteria, D_3__Frankiales, D_4__Geodermatophilaceae	2	0	0	0	0	0	1.32e-05	0	0	0	0
uncultured-3	D_0__Bacteria, D_1__Actinobacteria, D_2__Actinobacteria, D_3__Frankiales, D_4__uncultured	6	0	0	0	0	0	3.97e-05	0	0	0	0
Brevibacteriaceae	D_0__Bacteria, D_1__Actinobacteria, D_2__Actinobacteria, D_3__Micrococcales, D_4__Brevibacteriaceae	152	0.000198	5.36e-05	4.15e-05	0	5.9e-06	6.61e-05	0.000212	0.000161	0.000825	2.84e-05
Dermabacteraceae	D_0__Bacteria, D_1__Actinobacteria, D_2__Actinobacteria, D_3__Micrococcales, D_4__Dermabacteraceae	230	0	0	0	0	0	0	0.0013	0	4.67e-05	0
Dermacoccaceae	D_0__Bacteria, D_1__Actinobacteria, D_2__Actinobacteria, D_3__Micrococcales, D_4__Dermacoccaceae	119	0	0	9.35e-05	0	0	0	5.72e-06	0	0.00156	0
Microbacteriaceae	D_0__Bacteria, D_1__Actinobacteria, D_2__Actinobacteria, D_3__Micrococcales, D_4__Microbacteriaceae	87	0.000382	0	0	0	0	1.32e-05	0	0	0.00042	0
Micrococcaceae	D_0__Bacteria, D_1__Actinobacteria, D_2__Actinobacteria, D_3__Micrococcales, D_4__Micrococcaceae	24306	0.02	0.03	0.02	2.86e-05	0.03	0.02	0.01	0.01	0.01	0.03
Micromonosporaceae	D_0__Bacteria, D_1__Actinobacteria, D_2__Actinobacteria, D_3__Micromonosporales, D_4__Micromonosporaceae	8	5.28e-05	0	0	0	0	0	0	0	0	0
Nocardioidaceae	D_0__Bacteria, D_1__Actinobacteria, D_2__Actinobacteria, D_3__Propionibacteriales, D_4__Nocardioidaceae	599	0.000521	0	0	0.00371	0	0	0	0	0	0
Propionibacteriaceae	D_0__Bacteria, D_1__Actinobacteria, D_2__Actinobacteria, D_3__Propionibacteriales, D_4__Propionibacteriaceae	23435	0.00666	0.05	0.00159	0.03	0.02	0.03	0.02	0.00494	0.00347	0.000312
Pseudonocardiaceae	D_0__Bacteria, D_1__Actinobacteria, D_2__Actinobacteria, D_3__Pseudonocardiales, D_4__Pseudonocardiaceae	222	0	0	0	0	0.000177	0.00127	0	0	0	0
Atopobiaceae	D_0__Bacteria, D_1__Actinobacteria, D_2__Coriobacteriia, D_3__Coriobacteriales, D_4__Atopobiaceae	17	0	0	0	0	7.08e-05	0	2.86e-05	0	0	0
Eggerthellaceae	D_0__Bacteria, D_1__Actinobacteria, D_2__Coriobacteriia, D_3__Coriobacteriales, D_4__Eggerthellaceae	586	0	0	0	0.00417	0	1.32e-05	0	0	0	0
Bacteroidaceae	D_0__Bacteria, D_1__Bacteroidetes, D_2__Bacteroidia, D_3__Bacteroidales, D_4__Bacteroidaceae	18571	0.01	0.04	0	0.03	0.02	0.03	0	0.02	0.00507	0.00544
Muribaculaceae	D_0__Bacteria, D_1__Bacteroidetes, D_2__Bacteroidia, D_3__Bacteroidales, D_4__Muribaculaceae	14541	0	0.00137	1.04e-05	0.08	0.00177	0.00631	0.00686	0.000161	0.000202	0.00035
Porphyromonadaceae	D_0__Bacteria, D_1__Bacteroidetes, D_2__Bacteroidia, D_3__Bacteroidales, D_4__Porphyromonadaceae	150	0	0	0	0	0.000737	0	0	0	0.000358	1.89e-05
Prevotellaceae	D_0__Bacteria, D_1__Bacteroidetes, D_2__Bacteroidia, D_3__Bacteroidales, D_4__Prevotellaceae	374	0.000224	0	0	2.86e-05	0	0.0022	1.14e-05	0	0	1.89e-05
Rikenellaceae	D_0__Bacteria, D_1__Bacteroidetes, D_2__Bacteroidia, D_3__Bacteroidales, D_4__Rikenellaceae	37	0.000231	8.93e-06	0	7.14e-06	0	0	0	0	0	0
Tannerellaceae	D_0__Bacteria, D_1__Bacteroidetes, D_2__Bacteroidia, D_3__Bacteroidales, D_4__Tannerellaceae	3614	0.00813	0.01	0	0	0	0.00815	0	0	0	0.000236
uncultured-4	D_0__Bacteria, D_1__Bacteroidetes, D_2__Bacteroidia, D_3__Bacteroidales, D_4__uncultured	2	0	0	0	1.43e-05	0	0	0	0	0	0
Chitinophagaceae	D_0__Bacteria, D_1__Bacteroidetes, D_2__Bacteroidia, D_3__Chitinophagales, D_4__Chitinophagaceae	14	0	0	0	0	0	0	0	0.000563	0	0
Flavobacteriaceae	D_0__Bacteria, D_1__Bacteroidetes, D_2__Bacteroidia, D_3__Flavobacteriales, D_4__Flavobacteriaceae	406	0	0	0	0	0	0	0.00232	0	0	0
Weeksellaceae	D_0__Bacteria, D_1__Bacteroidetes, D_2__Bacteroidia, D_3__Flavobacteriales, D_4__Weeksellaceae	2394	0.000125	0	0.000717	0.02	0	0	0.000458	0	0	0
Sphingobacteriaceae	D_0__Bacteria, D_1__Bacteroidetes, D_2__Bacteroidia, D_3__Sphingobacteriales, D_4__Sphingobacteriaceae	80	0.000528	0	0	0	0	0	0	0	0	0
Ambiguous_taxa-1	D_0__Bacteria, D_1__Cyanobacteria, D_2__Oxyphotobacteria, D_3__Chloroplast, Ambiguous_taxa	1455	0.00156	0	0	0.00815	0	0.000172	0	4.02e-05	0.000778	0
Phaseolus acutifolius (tepary bean)	D_0__Bacteria, D_1__Cyanobacteria, D_2__Oxyphotobacteria, D_3__Chloroplast, D_4__Phaseolus acutifolius (tepary bean)	5	0	0	0	0	0	0	0	0	7.78e-05	0
Pinus greggii	D_0__Bacteria, D_1__Cyanobacteria, D_2__Oxyphotobacteria, D_3__Chloroplast, D_4__Pinus greggii	698	0	0	0	0	0	0.00461	0	0	0	0
Rubus hybrid cultivar	D_0__Bacteria, D_1__Cyanobacteria, D_2__Oxyphotobacteria, D_3__Chloroplast, D_4__Rubus hybrid cultivar	2	0	0	0	0	0	1.32e-05	0	0	0	0
Solanum melongena (eggplant)	D_0__Bacteria, D_1__Cyanobacteria, D_2__Oxyphotobacteria, D_3__Chloroplast, D_4__Solanum melongena (eggplant)	395	0.000119	0	0	0.0023	0	0	0	0	0.000856	0
Triticum aestivum (bread wheat)	D_0__Bacteria, D_1__Cyanobacteria, D_2__Oxyphotobacteria, D_3__Chloroplast, D_4__Triticum aestivum (bread wheat)	568	0.000653	0	4.67e-05	5.71e-05	0	0.00241	0	0.00149	0.000716	3.78e-05
Leptolyngbyaceae	D_0__Bacteria, D_1__Cyanobacteria, D_2__Oxyphotobacteria, D_3__Leptolyngbyales, D_4__Leptolyngbyaceae	884	0	0.00789	0	0	0	0	0	0	0	0
uncultured-5	D_0__Bacteria, D_1__Cyanobacteria, D_2__Oxyphotobacteria, D_3__Nostocales, D_4__uncultured	1283	0	0.01	0	0	0	0	0	0	0	0
Ambiguous_taxa-2	D_0__Bacteria, D_1__Cyanobacteria, D_2__Sericytochromatia, Ambiguous_taxa, Ambiguous_taxa	667	0	0.00595	0	0	0	0	0	0	0	0
Ambiguous_taxa-3	D_0__Bacteria, D_1__Dadabacteria, D_2__Dadabacteriia, D_3__Dadabacteriales, Ambiguous_taxa	1105	0	0	0	0.00789	5.9e-06	0	0	0	0	0
Deinococcaceae	D_0__Bacteria, D_1__Deinococcus-Thermus, D_2__Deinococci, D_3__Deinococcales, D_4__Deinococcaceae	131	0	0.000634	0	0	0	0	0.000343	0	0	0
Thermaceae	D_0__Bacteria, D_1__Deinococcus-Thermus, D_2__Deinococci, D_3__Thermales, D_4__Thermaceae	1070	0	0	0	0	0	0.00707	0	0	0	0
Campylobacteraceae	D_0__Bacteria, D_1__Epsilonbacteraeota, D_2__Campylobacteria, D_3__Campylobacterales, D_4__Campylobacteraceae	181	0.00119	0	0	0	0	0	0	0	0	0
Ambiguous_taxa-4	D_0__Bacteria, D_1__Firmicutes, D_2__Bacilli, Ambiguous_taxa, Ambiguous_taxa	6	0	0	0	0	0	0	3.43e-05	0	0	0
Ambiguous_taxa-5	D_0__Bacteria, D_1__Firmicutes, D_2__Bacilli, D_3__Bacillales, Ambiguous_taxa	25	0	0	2.08e-05	0	1.18e-05	5.95e-05	4.58e-05	0	0	1.89e-05
Alicyclobacillaceae	D_0__Bacteria, D_1__Firmicutes, D_2__Bacilli, D_3__Bacillales, D_4__Alicyclobacillaceae	164	9.23e-05	7.14e-05	0.000109	3.57e-05	0.00013	0.000119	0.000298	0.000121	0.000156	0.000104
Bacillaceae	D_0__Bacteria, D_1__Firmicutes, D_2__Bacilli, D_3__Bacillales, D_4__Bacillaceae	14506	0.01	0.00469	0.00879	0.00408	0.01	0.00932	0.00706	0.02	0.02	0.03
Family XI-1	D_0__Bacteria, D_1__Firmicutes, D_2__Bacilli, D_3__Bacillales, D_4__Family XI	917	0.000297	0.00172	3.12e-05	0.00416	0.000159	3.31e-05	0	0	0.000887	9.45e-06
Paenibacillaceae	D_0__Bacteria, D_1__Firmicutes, D_2__Bacilli, D_3__Bacillales, D_4__Paenibacillaceae	4	0	0	0	0	1.18e-05	0	0	0	0	1.89e-05
Planococcaceae	D_0__Bacteria, D_1__Firmicutes, D_2__Bacilli, D_3__Bacillales, D_4__Planococcaceae	27887	0.02	0.01	0.00967	0.0019	0.03	0.00926	0.06	0.03	0.02	0.03
Staphylococcaceae	D_0__Bacteria, D_1__Firmicutes, D_2__Bacilli, D_3__Bacillales, D_4__Staphylococcaceae	510611	0.46	0.33	0.58	0.13	0.36	0.43	0.37	0.48	0.56	0.33
Aerococcaceae	D_0__Bacteria, D_1__Firmicutes, D_2__Bacilli, D_3__Lactobacillales, D_4__Aerococcaceae	54280	0.04	0.02	0.03	0.04	0.05	0.02	0.06	0.07	0.03	0.09
Carnobacteriaceae	D_0__Bacteria, D_1__Firmicutes, D_2__Bacilli, D_3__Lactobacillales, D_4__Carnobacteriaceae	59509	0.03	0.1	0.02	0.06	0.04	0.05	0.04	0.02	0.03	0.05
Enterococcaceae	D_0__Bacteria, D_1__Firmicutes, D_2__Bacilli, D_3__Lactobacillales, D_4__Enterococcaceae	570	0.000521	5.36e-05	0.000322	2.14e-05	0.000661	0.000701	0.000755	0.000563	0.000296	0.00035
Lactobacillaceae	D_0__Bacteria, D_1__Firmicutes, D_2__Bacilli, D_3__Lactobacillales, D_4__Lactobacillaceae	16088	0.00288	7.14e-05	0.000597	0.08	0.01	0.0039	0.00813	0.00189	0.000451	0.00108
Leuconostocaceae	D_0__Bacteria, D_1__Firmicutes, D_2__Bacilli, D_3__Lactobacillales, D_4__Leuconostocaceae	18	0	0	9.35e-05	0	0	0	0	0	0	0
Streptococcaceae	D_0__Bacteria, D_1__Firmicutes, D_2__Bacilli, D_3__Lactobacillales, D_4__Streptococcaceae	14734	0.00195	0.02	0.00136	0.02	0.00448	0.02	0.03	0.000563	0.00355	0.00129
Clostridiaceae 1	D_0__Bacteria, D_1__Firmicutes, D_2__Clostridia, D_3__Clostridiales, D_4__Clostridiaceae 1	1470	1.98e-05	0	0	0.01	5.9e-06	1.98e-05	5.15e-05	0	0	2.84e-05
Clostridiales vadinBB60 group	D_0__Bacteria, D_1__Firmicutes, D_2__Clostridia, D_3__Clostridiales, D_4__Clostridiales vadinBB60 group	19	5.28e-05	0	2.6e-05	7.14e-06	2.95e-05	0	0	0	0	0
Defluviitaleaceae	D_0__Bacteria, D_1__Firmicutes, D_2__Clostridia, D_3__Clostridiales, D_4__Defluviitaleaceae	1461	0	0	0	0.01	0	0	0	0	0	0
Family XI-2	D_0__Bacteria, D_1__Firmicutes, D_2__Clostridia, D_3__Clostridiales, D_4__Family XI	1962	0.00134	0.00249	0.000426	6.43e-05	0.000961	0.00501	0.00123	0.000402	0.00286	0.000567
Lachnospiraceae	D_0__Bacteria, D_1__Firmicutes, D_2__Clostridia, D_3__Clostridiales, D_4__Lachnospiraceae	31297	0.03	0.03	0.00137	0.09	0.00137	0.05	0.01	0.00237	0.000389	0.000595
Peptococcaceae	D_0__Bacteria, D_1__Firmicutes, D_2__Clostridia, D_3__Clostridiales, D_4__Peptococcaceae	1376	0	0	0	0.00982	0	0	0	0	0	1.89e-05
Peptostreptococcaceae	D_0__Bacteria, D_1__Firmicutes, D_2__Clostridia, D_3__Clostridiales, D_4__Peptostreptococcaceae	24094	0.02	0.01	0.03	0.00496	0.02	0.02	0.02	0.02	0.02	0.02
Ruminococcaceae	D_0__Bacteria, D_1__Firmicutes, D_2__Clostridia, D_3__Clostridiales, D_4__Ruminococcaceae	3307	0.00382	1.79e-05	0.000545	0.02	5.9e-06	0.00219	4.01e-05	0.000161	0	0.00018
Erysipelotrichaceae	D_0__Bacteria, D_1__Firmicutes, D_2__Erysipelotrichia, D_3__Erysipelotrichales, D_4__Erysipelotrichaceae	6228	0.000541	0.01	0.0012	0.00111	0.00849	0.02	0	0.000121	0	0.00018
Veillonellaceae	D_0__Bacteria, D_1__Firmicutes, D_2__Negativicutes, D_3__Selenomonadales, D_4__Veillonellaceae	211	0	0.000562	0.000748	2.14e-05	0	6.61e-06	0	0	0	0
Fusobacteriaceae	D_0__Bacteria, D_1__Fusobacteria, D_2__Fusobacteriia, D_3__Fusobacteriales, D_4__Fusobacteriaceae	194	0.00125	0	0	0	0	0	1.72e-05	0	1.56e-05	9.45e-06
Leptotrichiaceae	D_0__Bacteria, D_1__Fusobacteria, D_2__Fusobacteriia, D_3__Fusobacteriales, D_4__Leptotrichiaceae	363	0.0022	0	0	0	0	0	0	0	0.000405	3.78e-05
Saccharimonadaceae	D_0__Bacteria, D_1__Patescibacteria, D_2__Saccharimonadia, D_3__Saccharimonadales, D_4__Saccharimonadaceae	277	0.00181	0	0	0	0	0	0	8.04e-05	0	0
uncultured bacterium-1	D_0__Bacteria, D_1__Patescibacteria, D_2__Saccharimonadia, D_3__Saccharimonadales, D_4__uncultured bacterium	3	0	0	0	0	0	0	0	0.000121	0	0
Acetobacteraceae	D_0__Bacteria, D_1__Proteobacteria, D_2__Alphaproteobacteria, D_3__Acetobacterales, D_4__Acetobacteraceae	1772	0.000389	0.01	0	2.14e-05	0.000743	0	0	0	0.0021	0.000142
Azospirillaceae	D_0__Bacteria, D_1__Proteobacteria, D_2__Alphaproteobacteria, D_3__Azospirillales, D_4__Azospirillaceae	3	0	0	0	0	0	1.98e-05	0	0	0	0
Caulobacteraceae	D_0__Bacteria, D_1__Proteobacteria, D_2__Alphaproteobacteria, D_3__Caulobacterales, D_4__Caulobacteraceae	583	0	0.000384	0.00041	7.14e-06	1.18e-05	0	0.00262	0	0	9.45e-06
Reyranellaceae	D_0__Bacteria, D_1__Proteobacteria, D_2__Alphaproteobacteria, D_3__Reyranellales, D_4__Reyranellaceae	351	0	0.00313	0	0	0	0	0	0	0	0
Beijerinckiaceae	D_0__Bacteria, D_1__Proteobacteria, D_2__Alphaproteobacteria, D_3__Rhizobiales, D_4__Beijerinckiaceae	129	0.000145	0	0	0	0	0.000688	0	0.000121	0	0
Rhizobiaceae	D_0__Bacteria, D_1__Proteobacteria, D_2__Alphaproteobacteria, D_3__Rhizobiales, D_4__Rhizobiaceae	167	0	0	0	0	0	0	0.000956	0	0	0
Xanthobacteraceae	D_0__Bacteria, D_1__Proteobacteria, D_2__Alphaproteobacteria, D_3__Rhizobiales, D_4__Xanthobacteraceae	6487	0	0	0	0.03	0.000342	0.01	0	0.000442	0	0
Rhodobacteraceae	D_0__Bacteria, D_1__Proteobacteria, D_2__Alphaproteobacteria, D_3__Rhodobacterales, D_4__Rhodobacteraceae	2189	0.000745	0	0	0	0.000484	0.01	0	0.000241	0.00042	9.45e-06
uncultured-6	D_0__Bacteria, D_1__Proteobacteria, D_2__Alphaproteobacteria, D_3__Rhodospirillales, D_4__uncultured	33	0	0	0	1.43e-05	0	0	0	0	0.000482	0
Mitochondria	D_0__Bacteria, D_1__Proteobacteria, D_2__Alphaproteobacteria, D_3__Rickettsiales, D_4__Mitochondria	2	0	0	0	0	0	0	0	0	3.11e-05	0
Sphingomonadaceae	D_0__Bacteria, D_1__Proteobacteria, D_2__Alphaproteobacteria, D_3__Sphingomonadales, D_4__Sphingomonadaceae	782	0	5.36e-05	0	7.86e-05	0.00224	0.00255	0	0	0	0
mle1-27	D_0__Bacteria, D_1__Proteobacteria, D_2__Deltaproteobacteria, D_3__Myxococcales, D_4__mle1-27	4	0	0	0	0	0	0	0	0	0	3.78e-05
Aeromonadaceae	D_0__Bacteria, D_1__Proteobacteria, D_2__Gammaproteobacteria, D_3__Aeromonadales, D_4__Aeromonadaceae	189	0	0.00169	0	0	0	0	0	0	0	0
Alteromonadaceae	D_0__Bacteria, D_1__Proteobacteria, D_2__Gammaproteobacteria, D_3__Alteromonadales, D_4__Alteromonadaceae	5	0	8.93e-06	0	2.86e-05	0	0	0	0	0	0
Idiomarinaceae	D_0__Bacteria, D_1__Proteobacteria, D_2__Gammaproteobacteria, D_3__Alteromonadales, D_4__Idiomarinaceae	3	0	0	0	0	0	0	1.72e-05	0	0	0
Burkholderiaceae	D_0__Bacteria, D_1__Proteobacteria, D_2__Gammaproteobacteria, D_3__Betaproteobacteriales, D_4__Burkholderiaceae	67861	0.05	0.07	0.03	0.03	0.06	0.02	0.06	0.06	0.05	0.13
Gallionellaceae	D_0__Bacteria, D_1__Proteobacteria, D_2__Gammaproteobacteria, D_3__Betaproteobacteriales, D_4__Gallionellaceae	183	0	0	0	0.00126	3.54e-05	0	0	0	0	0
Hydrogenophilaceae	D_0__Bacteria, D_1__Proteobacteria, D_2__Gammaproteobacteria, D_3__Betaproteobacteriales, D_4__Hydrogenophilaceae	285	0	0	0	0	0	0.00188	0	0	0	0
Neisseriaceae	D_0__Bacteria, D_1__Proteobacteria, D_2__Gammaproteobacteria, D_3__Betaproteobacteriales, D_4__Neisseriaceae	1379	5.28e-05	0.00364	1.56e-05	0.00434	6.49e-05	1.98e-05	0.000973	8.04e-05	0.00255	1.89e-05
Nitrosomonadaceae	D_0__Bacteria, D_1__Proteobacteria, D_2__Gammaproteobacteria, D_3__Betaproteobacteriales, D_4__Nitrosomonadaceae	5	0	0	0	3.57e-05	0	0	0	0	0	0
Rhodocyclaceae	D_0__Bacteria, D_1__Proteobacteria, D_2__Gammaproteobacteria, D_3__Betaproteobacteriales, D_4__Rhodocyclaceae	48	0	0	0	0	0.00026	2.64e-05	0	0	0	0
Sulfuricellaceae	D_0__Bacteria, D_1__Proteobacteria, D_2__Gammaproteobacteria, D_3__Betaproteobacteriales, D_4__Sulfuricellaceae	602	0	0	0	0.0043	0	0	0	0	0	0
Cardiobacteriaceae	D_0__Bacteria, D_1__Proteobacteria, D_2__Gammaproteobacteria, D_3__Cardiobacteriales, D_4__Cardiobacteriaceae	2	0	0	0	0	0	0	0	0	3.11e-05	0
Enterobacteriaceae	D_0__Bacteria, D_1__Proteobacteria, D_2__Gammaproteobacteria, D_3__Enterobacteriales, D_4__Enterobacteriaceae	49757	0.02	0.06	0.00481	0.14	0.02	0.03	0.06	0.00956	0.00996	0.003
Halomonadaceae	D_0__Bacteria, D_1__Proteobacteria, D_2__Gammaproteobacteria, D_3__Oceanospirillales, D_4__Halomonadaceae	8	0	0	0	0	0	0	0	0	0.000124	0
Pasteurellaceae	D_0__Bacteria, D_1__Proteobacteria, D_2__Gammaproteobacteria, D_3__Pasteurellales, D_4__Pasteurellaceae	786	0.00103	0	0	0.00446	0	0	2.86e-05	0	0	0
Moraxellaceae	D_0__Bacteria, D_1__Proteobacteria, D_2__Gammaproteobacteria, D_3__Pseudomonadales, D_4__Moraxellaceae	1301	0.000626	0.00186	0.000358	0.000257	0.000602	0.00347	0.000343	0	0.00314	3.78e-05
Pseudomonadaceae	D_0__Bacteria, D_1__Proteobacteria, D_2__Gammaproteobacteria, D_3__Pseudomonadales, D_4__Pseudomonadaceae	720	0.000679	0.00113	0.00027	0.00122	0.00013	0.000522	0.000801	8.04e-05	0.000327	2.84e-05
Rhodanobacteraceae	D_0__Bacteria, D_1__Proteobacteria, D_2__Gammaproteobacteria, D_3__Xanthomonadales, D_4__Rhodanobacteraceae	9	0	8.93e-06	0	5.71e-05	0	0	0	0	0	0
Xanthomonadaceae	D_0__Bacteria, D_1__Proteobacteria, D_2__Gammaproteobacteria, D_3__Xanthomonadales, D_4__Xanthomonadaceae	3639	0.000514	0.02	0.000171	0.00987	0.000466	0.000298	0.00087	8.04e-05	0.000482	9.45e-06
uncultured bacterium-2	D_0__Bacteria, D_1__Tenericutes, D_2__Mollicutes, D_3__Mollicutes RF39, D_4__uncultured bacterium	8	0	0	0	0	4.72e-05	0	0	0	0	0

## Sheet: BAL_Family
Family (Aggregated)	Taxonomy	Combined Abundance	BAL C1 Abundance	BAL C2 Abundance	BAL C3 Abundance	BAL C4 Abundance	BAL C5 Abundance	BAL K1 Abundance	BAL K2 Abundance	BAL K3 Abundance	BAL K4 Abundance	BAL K5 Abundance
uncultured Aminicenantes bacterium	D_0__Bacteria, D_1__Acidobacteria, D_2__Aminicenantia, D_3__Aminicenantales, D_4__uncultured Aminicenantes bacterium	6	1.06e-05	2.01e-05	0	7.87e-06	0	0	0	7.57e-06	5.38e-06	0
Blastocatellaceae	D_0__Bacteria, D_1__Acidobacteria, D_2__Blastocatellia (Subgroup 4), D_3__Blastocatellales, D_4__Blastocatellaceae	1529	1.06e-05	0.0041	0	0	0	0	0	0	0.00602	0
Pyrinomonadaceae	D_0__Bacteria, D_1__Acidobacteria, D_2__Blastocatellia (Subgroup 4), D_3__Pyrinomonadales, D_4__Pyrinomonadaceae	3287	0.00501	0.01	0	0.00261	0.00176	0.000873	6.99e-06	0.000576	0.00447	0
uncultured bacterium-01	D_0__Bacteria, D_1__Acidobacteria, D_2__Subgroup 18, D_3__uncultured bacterium, D_4__uncultured bacterium	171	0.0018	0	0	0	0	0	0	0	0	0
uncultured bacterium-02	D_0__Bacteria, D_1__Acidobacteria, D_2__Subgroup 21, D_3__uncultured bacterium, D_4__uncultured bacterium	3	3.17e-05	0	0	0	0	0	0	0	0	0
uncultured bacterium-03	D_0__Bacteria, D_1__Acidobacteria, D_2__Subgroup 6, D_3__uncultured bacterium, D_4__uncultured bacterium	1070	0.01	0	0	0	0	0	0	0	0	0
uncultured-01	D_0__Bacteria, D_1__Actinobacteria, D_2__Acidimicrobiia, D_3__Microtrichales, D_4__uncultured	307	0	0	0	0.00242	0	0	0	0	0	0
uncultured actinobacterium	D_0__Bacteria, D_1__Actinobacteria, D_2__Acidimicrobiia, D_3__uncultured, D_4__uncultured actinobacterium	2	0	0	9.7e-06	0	0	0	0	7.57e-06	0	0
Actinomycetaceae	D_0__Bacteria, D_1__Actinobacteria, D_2__Actinobacteria, D_3__Actinomycetales, D_4__Actinomycetaceae	1175	0.000507	0.000331	0.000446	0.00557	0.00036	0.00153	0	0.000167	0.000398	4.06e-05
Corynebacteriaceae	D_0__Bacteria, D_1__Actinobacteria, D_2__Actinobacteria, D_3__Corynebacteriales, D_4__Corynebacteriaceae	43578	0.06	0.04	0.07	0.05	0.09	0.01	6.99e-06	0.03	0.02	0.00969
Mycobacteriaceae	D_0__Bacteria, D_1__Actinobacteria, D_2__Actinobacteria, D_3__Corynebacteriales, D_4__Mycobacteriaceae	1425	0.00445	0.00104	0.00118	0.0017	0.00328	0.000589	0	0.000598	0.000334	0.00021
Nocardiaceae	D_0__Bacteria, D_1__Actinobacteria, D_2__Actinobacteria, D_3__Corynebacteriales, D_4__Nocardiaceae	882	2.11e-05	0.00377	2.91e-05	0	4.24e-05	0	0	0.00376	0	0
Geodermatophilaceae	D_0__Bacteria, D_1__Actinobacteria, D_2__Actinobacteria, D_3__Frankiales, D_4__Geodermatophilaceae	594	0	0	0	0	0	0.00416	0	0	0	0.000244
Glycomycetaceae	D_0__Bacteria, D_1__Actinobacteria, D_2__Actinobacteria, D_3__Glycomycetales, D_4__Glycomycetaceae	2	1.06e-05	0	0	7.87e-06	0	0	0	0	0	0
Brevibacteriaceae	D_0__Bacteria, D_1__Actinobacteria, D_2__Actinobacteria, D_3__Micrococcales, D_4__Brevibacteriaceae	170	0	0	0	0	0	0.00127	0	0	0	0
Dermabacteraceae	D_0__Bacteria, D_1__Actinobacteria, D_2__Actinobacteria, D_3__Micrococcales, D_4__Dermabacteraceae	323	0	0	0	0	0	0.00241	0	0	0	0
Dermacoccaceae	D_0__Bacteria, D_1__Actinobacteria, D_2__Actinobacteria, D_3__Micrococcales, D_4__Dermacoccaceae	1599	0	0	0	0	0.02	0	0	0	0	0
Intrasporangiaceae	D_0__Bacteria, D_1__Actinobacteria, D_2__Actinobacteria, D_3__Micrococcales, D_4__Intrasporangiaceae	460	0	0	0	0	0.00462	0	0	0	0	0.000162
Jonesiaceae	D_0__Bacteria, D_1__Actinobacteria, D_2__Actinobacteria, D_3__Micrococcales, D_4__Jonesiaceae	278	0	0	0	0	0	0.00207	0	0	0	0
Microbacteriaceae	D_0__Bacteria, D_1__Actinobacteria, D_2__Actinobacteria, D_3__Micrococcales, D_4__Microbacteriaceae	1663	0.00107	0.00427	0.00786	0.000102	0.000625	0.000104	0	0.00182	0	0
Micrococcaceae	D_0__Bacteria, D_1__Actinobacteria, D_2__Actinobacteria, D_3__Micrococcales, D_4__Micrococcaceae	5676	2.11e-05	0.01	0.00819	0.00666	0.02	0.00288	0	0.00385	5.38e-06	0
Promicromonosporaceae	D_0__Bacteria, D_1__Actinobacteria, D_2__Actinobacteria, D_3__Micrococcales, D_4__Promicromonosporaceae	2	0	2.01e-05	0	0	0	0	0	0	0	0
Sanguibacteraceae	D_0__Bacteria, D_1__Actinobacteria, D_2__Actinobacteria, D_3__Micrococcales, D_4__Sanguibacteraceae	98	0	0	0	0	0	0.000731	0	0	0	0
Micromonosporaceae	D_0__Bacteria, D_1__Actinobacteria, D_2__Actinobacteria, D_3__Micromonosporales, D_4__Micromonosporaceae	86	0	0	0	0	4.24e-05	0	0	0.000621	0	0
Nocardioidaceae	D_0__Bacteria, D_1__Actinobacteria, D_2__Actinobacteria, D_3__Propionibacteriales, D_4__Nocardioidaceae	2058	0	0	5.82e-05	0.00682	0.00981	0.000507	0	0.0011	0	0.000318
Propionibacteriaceae	D_0__Bacteria, D_1__Actinobacteria, D_2__Actinobacteria, D_3__Propionibacteriales, D_4__Propionibacteriaceae	77158	0.15	0.1	0.1	0.1	0.05	0.05	0	0.05	0.05	0.03
Pseudonocardiaceae	D_0__Bacteria, D_1__Actinobacteria, D_2__Actinobacteria, D_3__Pseudonocardiales, D_4__Pseudonocardiaceae	925	0.00692	0	0	0.00157	0	0	0	0	0	0.000474
Streptomycetaceae	D_0__Bacteria, D_1__Actinobacteria, D_2__Actinobacteria, D_3__Streptomycetales, D_4__Streptomycetaceae	1128	0.00463	0	0	0	0	0	0	0.00476	0	0.000406
Nocardiopsaceae	D_0__Bacteria, D_1__Actinobacteria, D_2__Actinobacteria, D_3__Streptosporangiales, D_4__Nocardiopsaceae	66	0	0	0.00064	0	0	0	0	0	0	0
Thermomonosporaceae	D_0__Bacteria, D_1__Actinobacteria, D_2__Actinobacteria, D_3__Streptosporangiales, D_4__Thermomonosporaceae	46	0	0	0	0	0	0.000343	0	0	0	0
Atopobiaceae	D_0__Bacteria, D_1__Actinobacteria, D_2__Coriobacteriia, D_3__Coriobacteriales, D_4__Atopobiaceae	11	0	0	0	0	0	8.21e-05	0	0	0	0
Eggerthellaceae	D_0__Bacteria, D_1__Actinobacteria, D_2__Coriobacteriia, D_3__Coriobacteriales, D_4__Eggerthellaceae	920	0	0	0.00183	0.00107	0	0	0	0.00451	0	0
uncultured bacterium-04	D_0__Bacteria, D_1__Actinobacteria, D_2__MB-A2-108, D_3__uncultured bacterium, D_4__uncultured bacterium	4	0	0	0	0	0	0	0	0	0	2.71e-05
uncultured-02	D_0__Bacteria, D_1__Actinobacteria, D_2__Thermoleophilia, D_3__Gaiellales, D_4__uncultured	3	0	0	0	0	0	2.24e-05	0	0	0	0
Bacteroidaceae	D_0__Bacteria, D_1__Bacteroidetes, D_2__Bacteroidia, D_3__Bacteroidales, D_4__Bacteroidaceae	15455	0.03	0.01	0	0.00382	0	0	0	0.000682	0.05	0.00952
Marinifilaceae	D_0__Bacteria, D_1__Bacteroidetes, D_2__Bacteroidia, D_3__Bacteroidales, D_4__Marinifilaceae	3	0	0	0	2.36e-05	0	0	0	0	0	0
Muribaculaceae	D_0__Bacteria, D_1__Bacteroidetes, D_2__Bacteroidia, D_3__Bacteroidales, D_4__Muribaculaceae	18623	2.11e-05	0	0.01	0.04	0.00915	0.00774	6.99e-06	0.04	0.03	0
Porphyromonadaceae	D_0__Bacteria, D_1__Bacteroidetes, D_2__Bacteroidia, D_3__Bacteroidales, D_4__Porphyromonadaceae	25404	0.00731	0.07	0.03	0.02	0.02	0.02	0	0.05	0	0.000826
Prevotellaceae	D_0__Bacteria, D_1__Bacteroidetes, D_2__Bacteroidia, D_3__Bacteroidales, D_4__Prevotellaceae	10028	0.00217	0.04	0.00358	0.00483	0	0.00186	0	0.03	1.61e-05	0.00124
Rikenellaceae	D_0__Bacteria, D_1__Bacteroidetes, D_2__Bacteroidia, D_3__Bacteroidales, D_4__Rikenellaceae	11	1.06e-05	2.01e-05	3.88e-05	7.87e-06	0	0	0	7.57e-06	5.38e-06	6.77e-06
Tannerellaceae	D_0__Bacteria, D_1__Bacteroidetes, D_2__Bacteroidia, D_3__Bacteroidales, D_4__Tannerellaceae	2645	0.00817	0.01	0	7.87e-06	1.06e-05	0	0	0	0	0.00312
Chitinophagaceae	D_0__Bacteria, D_1__Bacteroidetes, D_2__Bacteroidia, D_3__Chitinophagales, D_4__Chitinophagaceae	545	0	0	0	0	0.00529	0	0	0	0	0.000311
Saprospiraceae	D_0__Bacteria, D_1__Bacteroidetes, D_2__Bacteroidia, D_3__Chitinophagales, D_4__Saprospiraceae	314	0	0	0	0	0	0	0	0	0	0.00213
Hymenobacteraceae	D_0__Bacteria, D_1__Bacteroidetes, D_2__Bacteroidia, D_3__Cytophagales, D_4__Hymenobacteraceae	567	0.00598	0	0	0	0	0	0	0	0	0
Microscillaceae	D_0__Bacteria, D_1__Bacteroidetes, D_2__Bacteroidia, D_3__Cytophagales, D_4__Microscillaceae	2	0	0	0	0	0	0	0	1.51e-05	0	0
Flavobacteriaceae	D_0__Bacteria, D_1__Bacteroidetes, D_2__Bacteroidia, D_3__Flavobacteriales, D_4__Flavobacteriaceae	634	0	0	0	0	0	0	0	0.0048	0	0
Weeksellaceae	D_0__Bacteria, D_1__Bacteroidetes, D_2__Bacteroidia, D_3__Flavobacteriales, D_4__Weeksellaceae	661	0	0	0.00492	0	0	0.00115	0	0	0	0
uncultured bacterium-05	D_0__Bacteria, D_1__Chloroflexi, D_2__SHA-26, D_3__uncultured bacterium, D_4__uncultured bacterium	551	0.00582	0	0	0	0	0	0	0	0	0
Ambiguous_taxa-01	D_0__Bacteria, D_1__Cyanobacteria, D_2__Oxyphotobacteria, D_3__Chloroplast, Ambiguous_taxa	2575	0	0	0	3.94e-05	0.00255	0.00468	0	0.00525	0.00543	0
Carya cathayensis	D_0__Bacteria, D_1__Cyanobacteria, D_2__Oxyphotobacteria, D_3__Chloroplast, D_4__Carya cathayensis	780	0	0	0	0.00609	0	0	0	3.79e-05	5.38e-06	0
Epipyxis sp. PR26KG	D_0__Bacteria, D_1__Cyanobacteria, D_2__Oxyphotobacteria, D_3__Chloroplast, D_4__Epipyxis sp. PR26KG	14	0	0	0	0	0.000148	0	0	0	0	0
Phaseolus acutifolius (tepary bean)	D_0__Bacteria, D_1__Cyanobacteria, D_2__Oxyphotobacteria, D_3__Chloroplast, D_4__Phaseolus acutifolius (tepary bean)	1103	0	0	0.01	0	0	0	0	0	0	0
Phaseolus vulgaris	D_0__Bacteria, D_1__Cyanobacteria, D_2__Oxyphotobacteria, D_3__Chloroplast, D_4__Phaseolus vulgaris	5	0	0	4.85e-05	0	0	0	0	0	0	0
Quercus robur	D_0__Bacteria, D_1__Cyanobacteria, D_2__Oxyphotobacteria, D_3__Chloroplast, D_4__Quercus robur	9	0	0	0	6.3e-05	0	7.46e-06	0	0	0	0
Solanum melongena (eggplant)	D_0__Bacteria, D_1__Cyanobacteria, D_2__Oxyphotobacteria, D_3__Chloroplast, D_4__Solanum melongena (eggplant)	317	0.000306	0	0	0	0	0	0	0.00218	0	0
Trapa bispinosa	D_0__Bacteria, D_1__Cyanobacteria, D_2__Oxyphotobacteria, D_3__Chloroplast, D_4__Trapa bispinosa	2	0	0	0	0	0	0	0	1.51e-05	0	0
Triticum aestivum (bread wheat)	D_0__Bacteria, D_1__Cyanobacteria, D_2__Oxyphotobacteria, D_3__Chloroplast, D_4__Triticum aestivum (bread wheat)	1435	0	0.00889	0	0	0.00582	0	0	0	0	0
uncultured eukaryote	D_0__Bacteria, D_1__Cyanobacteria, D_2__Oxyphotobacteria, D_3__Chloroplast, D_4__uncultured eukaryote	4	0	0	0	0	0	0	0	3.03e-05	0	0
Chroococcidiopsaceae	D_0__Bacteria, D_1__Cyanobacteria, D_2__Oxyphotobacteria, D_3__Nostocales, D_4__Chroococcidiopsaceae	660	0	0	0	0	0.00699	0	0	0	0	0
Nostocaceae	D_0__Bacteria, D_1__Cyanobacteria, D_2__Oxyphotobacteria, D_3__Nostocales, D_4__Nostocaceae	1059	0	0	0	0	0.01	0	0	0	0	0
Deinococcaceae	D_0__Bacteria, D_1__Deinococcus-Thermus, D_2__Deinococci, D_3__Deinococcales, D_4__Deinococcaceae	331	0	0	0.00033	0	0.00154	0.00113	0	0	0	0
Trueperaceae	D_0__Bacteria, D_1__Deinococcus-Thermus, D_2__Deinococci, D_3__Deinococcales, D_4__Trueperaceae	782	0	0	0	0	0.00829	0	0	0	0	0
Thermaceae	D_0__Bacteria, D_1__Deinococcus-Thermus, D_2__Deinococci, D_3__Thermales, D_4__Thermaceae	4302	0	0	0.00451	0.00195	0.00897	0.000664	0	0.00366	0.01	0.000758
uncultured bacterium-06	D_0__Bacteria, D_1__FBP, D_2__uncultured bacterium, D_3__uncultured bacterium, D_4__uncultured bacterium	4	0	0	0	0	0	0	0	0	0	2.71e-05
Ambiguous_taxa-02	D_0__Bacteria, D_1__Firmicutes, D_2__Bacilli, Ambiguous_taxa, Ambiguous_taxa	2	0	0	0	0	2.12e-05	0	0	0	0	0
Ambiguous_taxa-03	D_0__Bacteria, D_1__Firmicutes, D_2__Bacilli, D_3__Bacillales, Ambiguous_taxa	1119	4.22e-05	0	0	0.00876	1.06e-05	0	0	0	5.38e-06	0
Alicyclobacillaceae	D_0__Bacteria, D_1__Firmicutes, D_2__Bacilli, D_3__Bacillales, D_4__Alicyclobacillaceae	69	0	0	0	1.57e-05	0	0	0	1.51e-05	0	0.00044
Bacillaceae	D_0__Bacteria, D_1__Firmicutes, D_2__Bacilli, D_3__Bacillales, D_4__Bacillaceae	3927	0.01	0.00588	0.00675	0.00203	0.00155	0.00393	0	0.001	0.000344	0.000894
Family XI-01	D_0__Bacteria, D_1__Firmicutes, D_2__Bacilli, D_3__Bacillales, D_4__Family XI	7471	0.01	0.00837	0.00527	0.02	0.00866	0.00288	0	0.00784	4.3e-05	0.000609
Paenibacillaceae	D_0__Bacteria, D_1__Firmicutes, D_2__Bacilli, D_3__Bacillales, D_4__Paenibacillaceae	10	6.33e-05	0	0	2.36e-05	0	0	0	7.57e-06	0	0
Planococcaceae	D_0__Bacteria, D_1__Firmicutes, D_2__Bacilli, D_3__Bacillales, D_4__Planococcaceae	692	0.00226	1e-05	0	0.000346	0.00456	0	0	1.51e-05	5.38e-06	0
Staphylococcaceae	D_0__Bacteria, D_1__Firmicutes, D_2__Bacilli, D_3__Bacillales, D_4__Staphylococcaceae	209342	0.19	0.22	0.23	0.35	0.43	0.08	3.5e-05	0.21	0.1	0.02
Aerococcaceae	D_0__Bacteria, D_1__Firmicutes, D_2__Bacilli, D_3__Lactobacillales, D_4__Aerococcaceae	2621	0.00111	6.02e-05	0.01	0.000252	0.000519	0.00187	0	0.00542	5.38e-06	0.00117
Carnobacteriaceae	D_0__Bacteria, D_1__Firmicutes, D_2__Bacilli, D_3__Lactobacillales, D_4__Carnobacteriaceae	31028	0.07	0.03	0.03	0.04	0.01	0.02	0	0.02	0.03	0.00904
Enterococcaceae	D_0__Bacteria, D_1__Firmicutes, D_2__Bacilli, D_3__Lactobacillales, D_4__Enterococcaceae	120	7.39e-05	0	0.000291	0.000354	0.000117	0	0	1.51e-05	0.000135	0
Lactobacillaceae	D_0__Bacteria, D_1__Firmicutes, D_2__Bacilli, D_3__Lactobacillales, D_4__Lactobacillaceae	17631	0.00214	0.00403	0.0051	0.02	0.00298	0.00188	0	0.04	0.04	0.00247
P5D1-392	D_0__Bacteria, D_1__Firmicutes, D_2__Bacilli, D_3__Lactobacillales, D_4__P5D1-392	942	0.00379	0	0	0.00459	0	0	0	0	0	0
Streptococcaceae	D_0__Bacteria, D_1__Firmicutes, D_2__Bacilli, D_3__Lactobacillales, D_4__Streptococcaceae	15623	0.07	0.06	0.01	0.000213	0.000297	0.01	0	0.00685	3.77e-05	0.000406
Caldicoprobacteraceae	D_0__Bacteria, D_1__Firmicutes, D_2__Clostridia, D_3__Clostridiales, D_4__Caldicoprobacteraceae	2	0	0	0	0	0	0	0	1.51e-05	0	0
Clostridiaceae 1	D_0__Bacteria, D_1__Firmicutes, D_2__Clostridia, D_3__Clostridiales, D_4__Clostridiaceae 1	1348	0.000675	0.000371	0.000281	0.000716	0.000477	0.000276	0.000112	0.00745	0.000118	0.000156
Family XI-02	D_0__Bacteria, D_1__Firmicutes, D_2__Clostridia, D_3__Clostridiales, D_4__Family XI	25795	0.03	0.03	0.04	0.05	0.01	0.00997	6.99e-06	0.04	0.00528	0.00292
Gracilibacteraceae	D_0__Bacteria, D_1__Firmicutes, D_2__Clostridia, D_3__Clostridiales, D_4__Gracilibacteraceae	14	0	0.00014	0	0	0	0	0	0	0	0
Lachnospiraceae	D_0__Bacteria, D_1__Firmicutes, D_2__Clostridia, D_3__Clostridiales, D_4__Lachnospiraceae	69380	0.03	0.00733	0.07	0.05	0.00656	0.04	3.5e-05	0.1	0.17	0.03
Peptococcaceae	D_0__Bacteria, D_1__Firmicutes, D_2__Clostridia, D_3__Clostridiales, D_4__Peptococcaceae	3	0	0	9.7e-06	0	0	0	0	7.57e-06	5.38e-06	0
Peptostreptococcaceae	D_0__Bacteria, D_1__Firmicutes, D_2__Clostridia, D_3__Clostridiales, D_4__Peptostreptococcaceae	1261	0.000359	0.00143	0.000728	0.00374	0.00433	0	0	7.57e-06	0.000667	0
Ruminococcaceae	D_0__Bacteria, D_1__Firmicutes, D_2__Clostridia, D_3__Clostridiales, D_4__Ruminococcaceae	9530	0	1e-05	0.01	0.02	0	0.00468	0	0.02	0.00769	0.01
Erysipelotrichaceae	D_0__Bacteria, D_1__Firmicutes, D_2__Erysipelotrichia, D_3__Erysipelotrichales, D_4__Erysipelotrichaceae	4848	0	0.00529	0.00166	0.01	0	0.0051	0	0.00104	0.00817	1.35e-05
Veillonellaceae	D_0__Bacteria, D_1__Firmicutes, D_2__Negativicutes, D_3__Selenomonadales, D_4__Veillonellaceae	5134	0.00513	0.02	0.0069	7.87e-06	0.0075	0.00498	0	1.51e-05	0.00077	0.00137
Fusobacteriaceae	D_0__Bacteria, D_1__Fusobacteria, D_2__Fusobacteriia, D_3__Fusobacteriales, D_4__Fusobacteriaceae	8099	0.02	0.03	0.000796	0	0.000487	0.00109	0	0.01	0.00826	0
Leptotrichiaceae	D_0__Bacteria, D_1__Fusobacteria, D_2__Fusobacteriia, D_3__Fusobacteriales, D_4__Leptotrichiaceae	9227	0.00158	2.01e-05	0.01	0	0.00818	0.00294	6.99e-06	0.04	0.00517	0
Longimicrobiaceae	D_0__Bacteria, D_1__Gemmatimonadetes, D_2__Longimicrobia, D_3__Longimicrobiales, D_4__Longimicrobiaceae	125	0	0	0	0	0	0.000932	0	0	0	0
Hydrogenedensaceae	D_0__Bacteria, D_1__Hydrogenedentes, D_2__Hydrogenedentia, D_3__Hydrogenedentiales, D_4__Hydrogenedensaceae	1030	0	0.00989	7.76e-05	0	0	0	0	0	0.000194	0
Nitrospiraceae	D_0__Bacteria, D_1__Nitrospirae, D_2__Nitrospira, D_3__Nitrospirales, D_4__Nitrospiraceae	192	0	0	0	0	0	0	0	0	0	0.0013
uncultured bacterium-07	D_0__Bacteria, D_1__Patescibacteria, D_2__Gracilibacteria, D_3__Absconditabacteriales (SR1), D_4__uncultured bacterium	27	0	0.000271	0	0	0	0	0	0	0	0
Acetobacteraceae	D_0__Bacteria, D_1__Proteobacteria, D_2__Alphaproteobacteria, D_3__Acetobacterales, D_4__Acetobacteraceae	13547	0.07	0	0.04	0.00794	0.02	0.00107	2.1e-05	0	0	0
Azospirillaceae	D_0__Bacteria, D_1__Proteobacteria, D_2__Alphaproteobacteria, D_3__Azospirillales, D_4__Azospirillaceae	2258	0	0	0	0	0	1.49e-05	0	0	0.01	0
Caulobacteraceae	D_0__Bacteria, D_1__Proteobacteria, D_2__Alphaproteobacteria, D_3__Caulobacterales, D_4__Caulobacteraceae	1955	6.33e-05	0	0.00277	0	0	0.000739	0	0	0.00842	0
Reyranellaceae	D_0__Bacteria, D_1__Proteobacteria, D_2__Alphaproteobacteria, D_3__Reyranellales, D_4__Reyranellaceae	155	0	0	0	0	0	0	0	0	0	0.00105
Beijerinckiaceae	D_0__Bacteria, D_1__Proteobacteria, D_2__Alphaproteobacteria, D_3__Rhizobiales, D_4__Beijerinckiaceae	6134	0.0062	0.00609	0.01	4.72e-05	0.00315	0.01	0	0.00896	0	0
D05-2	D_0__Bacteria, D_1__Proteobacteria, D_2__Alphaproteobacteria, D_3__Rhizobiales, D_4__D05-2	520	0	0.00522	0	0	0	0	0	0	0	0
Hyphomicrobiaceae	D_0__Bacteria, D_1__Proteobacteria, D_2__Alphaproteobacteria, D_3__Rhizobiales, D_4__Hyphomicrobiaceae	20	0	0	0	0	0.000191	0	0	1.51e-05	0	0
Labraceae	D_0__Bacteria, D_1__Proteobacteria, D_2__Alphaproteobacteria, D_3__Rhizobiales, D_4__Labraceae	3	0	3.01e-05	0	0	0	0	0	0	0	0
Pleomorphomonadaceae	D_0__Bacteria, D_1__Proteobacteria, D_2__Alphaproteobacteria, D_3__Rhizobiales, D_4__Pleomorphomonadaceae	2	0	0	0	0	0	0	0	1.51e-05	0	0
Rhizobiaceae	D_0__Bacteria, D_1__Proteobacteria, D_2__Alphaproteobacteria, D_3__Rhizobiales, D_4__Rhizobiaceae	6078	0	0	0.00458	0	0	0.00666	0	0.01	0.02	0.000244
Rhizobiales Incertae Sedis	D_0__Bacteria, D_1__Proteobacteria, D_2__Alphaproteobacteria, D_3__Rhizobiales, D_4__Rhizobiales Incertae Sedis	49	0	0	0	0.000386	0	0	0	0	0	0
Xanthobacteraceae	D_0__Bacteria, D_1__Proteobacteria, D_2__Alphaproteobacteria, D_3__Rhizobiales, D_4__Xanthobacteraceae	2829	0	0.000652	0	0	0	0.001	0	0	0.01	0.00114
Rhodobacteraceae	D_0__Bacteria, D_1__Proteobacteria, D_2__Alphaproteobacteria, D_3__Rhodobacterales, D_4__Rhodobacteraceae	6996	0	0.02	0	0.00435	0.01	0.00257	0	0.01	0.00528	0.0033
Magnetospirillaceae	D_0__Bacteria, D_1__Proteobacteria, D_2__Alphaproteobacteria, D_3__Rhodospirillales, D_4__Magnetospirillaceae	9	0	0	2.91e-05	0	0	0	0	4.54e-05	0	0
Mitochondria	D_0__Bacteria, D_1__Proteobacteria, D_2__Alphaproteobacteria, D_3__Rickettsiales, D_4__Mitochondria	24883	1.06e-05	2.01e-05	0	0.00105	0	0.18	0	0	0	0
Sphingomonadaceae	D_0__Bacteria, D_1__Proteobacteria, D_2__Alphaproteobacteria, D_3__Sphingomonadales, D_4__Sphingomonadaceae	6856	0	0	0.00826	0.000645	0.04	0.00601	0	0.01	1.61e-05	0.00134
uncultured bacterium-08	D_0__Bacteria, D_1__Proteobacteria, D_2__Alphaproteobacteria, D_3__uncultured, D_4__uncultured bacterium	10	0	1e-05	3.88e-05	3.94e-05	0	0	0	0	0	0
Bdellovibrionaceae	D_0__Bacteria, D_1__Proteobacteria, D_2__Deltaproteobacteria, D_3__Bdellovibrionales, D_4__Bdellovibrionaceae	123	0	0	0	0	0	0	0	0.000932	0	0
Nannocystaceae	D_0__Bacteria, D_1__Proteobacteria, D_2__Deltaproteobacteria, D_3__Myxococcales, D_4__Nannocystaceae	238	0	0	0.00231	0	0	0	0	0	0	0
Thermodesulfobacteriaceae	D_0__Bacteria, D_1__Proteobacteria, D_2__Deltaproteobacteria, D_3__Thermodesulfobacteriales, D_4__Thermodesulfobacteriaceae	4	0	4.01e-05	0	0	0	0	0	0	0	0
Ambiguous_taxa-04	D_0__Bacteria, D_1__Proteobacteria, D_2__Gammaproteobacteria, Ambiguous_taxa, Ambiguous_taxa	21	0	0	0	0	0	0.000157	0	0	0	0
Acidithiobacillaceae	D_0__Bacteria, D_1__Proteobacteria, D_2__Gammaproteobacteria, D_3__Acidithiobacillales, D_4__Acidithiobacillaceae	2	0	0	0	1.57e-05	0	0	0	0	0	0
Aeromonadaceae	D_0__Bacteria, D_1__Proteobacteria, D_2__Gammaproteobacteria, D_3__Aeromonadales, D_4__Aeromonadaceae	59	0	0	0	0	0	0.000388	0	0	3.77e-05	0
Alteromonadaceae	D_0__Bacteria, D_1__Proteobacteria, D_2__Gammaproteobacteria, D_3__Alteromonadales, D_4__Alteromonadaceae	377	0	0	0	0	0	0.000739	0	0.00211	0	0
Idiomarinaceae	D_0__Bacteria, D_1__Proteobacteria, D_2__Gammaproteobacteria, D_3__Alteromonadales, D_4__Idiomarinaceae	43	0	0	0	0	0	6.71e-05	0.000119	0	3.23e-05	7.45e-05
Pseudoalteromonadaceae	D_0__Bacteria, D_1__Proteobacteria, D_2__Gammaproteobacteria, D_3__Alteromonadales, D_4__Pseudoalteromonadaceae	10	0	0	0	0	0	7.46e-05	0	0	0	0
Shewanellaceae	D_0__Bacteria, D_1__Proteobacteria, D_2__Gammaproteobacteria, D_3__Alteromonadales, D_4__Shewanellaceae	2	0	0	0	0	0	0	6.99e-06	0	0	6.77e-06
Burkholderiaceae	D_0__Bacteria, D_1__Proteobacteria, D_2__Gammaproteobacteria, D_3__Betaproteobacteriales, D_4__Burkholderiaceae	19596	0.02	1e-05	0.04	0.01	0.04	0.01	2.1e-05	0.02	0.03	0.00409
Neisseriaceae	D_0__Bacteria, D_1__Proteobacteria, D_2__Gammaproteobacteria, D_3__Betaproteobacteriales, D_4__Neisseriaceae	6190	0.000158	0.03	0.01	0.000748	0.02	0.00136	0	0.000212	0.000463	6.77e-06
SC-I-84	D_0__Bacteria, D_1__Proteobacteria, D_2__Gammaproteobacteria, D_3__Betaproteobacteriales, D_4__SC-I-84	91	0	0	0	0	0	0	0	0.000689	0	0
Cardiobacteriaceae	D_0__Bacteria, D_1__Proteobacteria, D_2__Gammaproteobacteria, D_3__Cardiobacteriales, D_4__Cardiobacteriaceae	3	0	3.01e-05	0	0	0	0	0	0	0	0
Enterobacteriaceae	D_0__Bacteria, D_1__Proteobacteria, D_2__Gammaproteobacteria, D_3__Enterobacteriales, D_4__Enterobacteriaceae	461161	0.13	0.12	0.14	0.09	0.07	0.44	0.99	0.14	0.33	0.84
Halomonadaceae	D_0__Bacteria, D_1__Proteobacteria, D_2__Gammaproteobacteria, D_3__Oceanospirillales, D_4__Halomonadaceae	146	0	0	0.00142	0	0	0	0	0	0	0
Nitrincolaceae	D_0__Bacteria, D_1__Proteobacteria, D_2__Gammaproteobacteria, D_3__Oceanospirillales, D_4__Nitrincolaceae	11	0	0	0	0	0	2.24e-05	1.4e-05	7.57e-06	2.69e-05	0
Pseudohongiellaceae	D_0__Bacteria, D_1__Proteobacteria, D_2__Gammaproteobacteria, D_3__Oceanospirillales, D_4__Pseudohongiellaceae	122	0	0	0	0.00096	0	0	0	0	0	0
Pasteurellaceae	D_0__Bacteria, D_1__Proteobacteria, D_2__Gammaproteobacteria, D_3__Pasteurellales, D_4__Pasteurellaceae	2970	0.0053	0.01	2.91e-05	6.3e-05	0.01	0	0	2.27e-05	0	0
Moraxellaceae	D_0__Bacteria, D_1__Proteobacteria, D_2__Gammaproteobacteria, D_3__Pseudomonadales, D_4__Moraxellaceae	8295	0.00913	0.00871	0.00368	0.01	0.0061	0.000634	0	0.01	0.01	1.35e-05
Pseudomonadaceae	D_0__Bacteria, D_1__Proteobacteria, D_2__Gammaproteobacteria, D_3__Pseudomonadales, D_4__Pseudomonadaceae	5810	0.001	0.00726	0.01	0.01	0.00053	0.00259	6.99e-06	0.00047	0.00881	0.00204
Vibrionaceae	D_0__Bacteria, D_1__Proteobacteria, D_2__Gammaproteobacteria, D_3__Vibrionales, D_4__Vibrionaceae	71	0	0.0001	0	0	0	0.000455	0	0	0	0
Rhodanobacteraceae	D_0__Bacteria, D_1__Proteobacteria, D_2__Gammaproteobacteria, D_3__Xanthomonadales, D_4__Rhodanobacteraceae	11	1.06e-05	0	6.79e-05	2.36e-05	0	0	0	0	0	0
Xanthomonadaceae	D_0__Bacteria, D_1__Proteobacteria, D_2__Gammaproteobacteria, D_3__Xanthomonadales, D_4__Xanthomonadaceae	5073	0.000865	0.00829	0.01	0.00904	0.00346	0.00116	6.99e-06	0.000326	0.00643	0.0013
Spirochaetaceae	D_0__Bacteria, D_1__Spirochaetes, D_2__Spirochaetia, D_3__Spirochaetales, D_4__Spirochaetaceae	2	0	0	0	0	0	0	0	1.51e-05	0	0
Synergistaceae	D_0__Bacteria, D_1__Synergistetes, D_2__Synergistia, D_3__Synergistales, D_4__Synergistaceae	116	0	0.00116	0	0	0	0	0	0	0	0
uncultured bacterium-09	D_0__Bacteria, D_1__Tenericutes, D_2__Mollicutes, D_3__Mollicutes RF39, D_4__uncultured bacterium	139	0	0	0	0	0	0	0	0	0.000748	0
uncultured bacterium-10	D_0__Bacteria, D_1__Verrucomicrobia, D_2__Verrucomicrobiae, D_3__LD1-PB3, D_4__uncultured bacterium	7	7.39e-05	0	0	0	0	0	0	0	0	0
