# Supplementary material for: Exploring the microbiota of upper respiratory tract during the development of pneumonia in a mouse model
Source: PLoS One. 2019 Sep 27;14(9):e0222589. doi: 10.1371/journal.pone.0222589 (PMC6764665; doi:10.1371/journal.pone.0222589)
Supplement: S2 Table — Scores indicate relative increase of Family level from the average of control mice in oral microbiota. (XLSX) [file pone.0222589.s002.xlsx]

## Sheet: Sheet1
	Cont					Kpn
Mouse #	1	2	3	4	5	1	2	3	4	5	P values
Streptococcaceae	1.17647	1.17647	0.60049	1.13971	0.906863	1.05392	1.07843	0.57598	1.10294	0.710784	0.2857
Staphylococcaceae	0.129049	0.0961414	4.38766	0.258098	0.129049	0.774293	0.645245	2.83908	0.516196	1.67764	0.1349
Corynebacteriaceae	0.196926	0.457436	2.97333	0.686153	0.686153	0.457436	0.228718	4.57436	0.686153	4.34564	0.5714
Lactobacillaceae	0.0253675	0.0571881	0.445044	0.0219629	4.45044	0.107256	0.890088	0.118159	0.149757	0.0491773	0.6905
Aerococcaceae	0.252193	0.144893	1.70739	2.16165	0.733866	1.026	0.245144	23.4962	1.00251	31.3283	0.4206
Burkholderiaceae	0.395183	0.3019	0.483379	0.7327	3.08684	0.56479	0.463026	33.9213	1.51798	33.9213	0.2063
Peptostreptococcaceae	0.114663	0.0852515	4.26257	0.319693	0.217818	0.942029	0.6948	4.26257	0.571185	2.2208	0.1032
Micrococcaceae	1.57566	0.633736	0.342478	1.71456	0.733571	1.02005	1.54961	1.49753	1.85346	2.57835	0.2222
Propionibacteriaceae	0.731914	0.40346	0.345391	0.337527	3.18171	181.466	1.15534	0.0250423	1.42149	0.165134	>0.9999
Bacillaceae	0.232061	0.0911055	3.05732	0.945435	0.674083	1.3629	0.639703	11.0997	1.08909	9.71219	0.1508
Planococcaceae	0.565018	0.150041	0.420384	0.268992	3.59557	1.19762	0.506894	11.5031	1.17329	11.2463	0.0952
Carnobacteriaceae	1.08168	0.518764	1.69978	1.02649	0.673289	3.10155	1.2546	18.2855	2.16703	36.7918	0.0159
Enterococcaceae	0	0.755293	1.58795	0	2.65676	329.805	219.87	36.645	2.83998	9.1307	0.0079
Relative increase of abundance (The avarage of abundance in control mice was defined as 1.0)
